# Supplementary material
Source: publisher figshare collection journal article supplement (https://acs.figshare.com/ndownloader/files/5179741)
Supplement: Supplementary file 1 [file 5179741]

data_General 
_audit_creation_date                  'Tue May 21 13:14:25 2002'
_audit_creation_method                'by teXsan'
_audit_update_record                   ?
#------------------------------------------------------------------------------
# PROCESSING SUMMARY (IUCr Office Use Only) 
_journal_date_recd_electronic          ?
_journal_date_from_coeditor            ?
_journal_date_accepted                 ?
_journal_coeditor_code                 ?
#------------------------------------------------------------------------------
# SUBMISSION DETAILS 
_publ_contact_author_name             ' ENTER NAME'
_publ_contact_author_address
;
    ENTER ADDRESS
;
_publ_contact_author_email            ' ENTER EMAIL ADDRESS '
_publ_contact_author_fax              ' ENTER FAX NUMBER '
_publ_contact_author_phone            ' ENTER PHONE NUMBER '
_publ_contact_letter
;
    ENTER TEXT OF LETTER
;
_publ_requested_journal               ' ENTER JOURNAL NAME HERE'
_publ_requested_category              ' CHOOSE FI FM FO CI CM CO or AD'

_publ_requested_coeditor_name          ?
#------------------------------------------------------------------------------
# TITLE AND AUTHOR LIST 

_publ_section_title
;
    ENTER SECTION TITLE
;

_publ_section_title_footnote
;
    ENTER FOOTNOTE TO TITLE OF PAPER
;
loop_
_publ_author_name
_publ_author_footnote
_publ_author_address
' FIRST AUTHORS NAME '
;
  FIRST AUTHORS FOOTNOTES
;
;
  FIRST AUTHORS ADDRESS
;
_publ_section_synopsis
;
  ENTER SYNOPSIS
;
#------------------------------------------------------------------------------
# TEXT 

_publ_section_abstract
;
    ENTER ABSTRACT
;

_publ_section_comment
;
    ENTER TEXT
;

_publ_section_acknowledgements
;
    ENTER ACKNOWLEDGEMENTS
;

_publ_section_references
;
    ENTER OTHER REFERENCES
Molecular Structure Corporation, Rigaku Corporation. (2000). teXsan. 
Single Crystal Structure Analysis Software. Version 1.11.
MSC, 3200 Research Forest Drive, The Woodlands, TX 77381, USA.
Rigaku, 3-9-12 Akishima, Tokyo, Japan.
North, A.C.T., Phillips, D. C. & Mathews, F. S. (1968).
Acta Cryst. A24, 351-359.
Zachariasen, W. H. (1967). Acta Cryst. 23, 558-564.
;

_publ_section_figure_captions
;
    ENTER FIGURE CAPTIONS
;


_publ_section_exptl_prep
;
    ENTER COMPOUND PREPARATION DETAILS
;

_publ_section_exptl_refinement
;
    ENTER SPECIAL DETAILS OF THE REFINEMENT
;
#------------------------------------------------------------------------------
data_kk073_kangaku_tanabe
#------------------------------------------------------------------------------
# CHEMICAL DATA 
_chemical_formula_sum                  'C13 H15 Cl2 N O '
_chemical_formula_moiety               'C13 H15 Cl2 N O '
_chemical_formula_weight               272.17
_chemical_melting_point                ?
#------------------------------------------------------------------------------
# CRYSTAL DATA 
_symmetry_cell_setting                 monoclinic
_symmetry_space_group_name_H-M        'P 1 21 1'
_symmetry_Int_Tables_number            4
loop_
_symmetry_equiv_pos_as_xyz
x,y,z
-x,1/2+y,-z
_cell_length_a                         8.705(2)
_cell_length_b                         5.185(3)
_cell_length_c                         15.168(3)
_cell_angle_alpha                      90
_cell_angle_beta                       101.69(2)
_cell_angle_gamma                      90
_cell_volume                           670.5(4)
_cell_formula_units_Z                  2
_cell_measurement_reflns_used          25
_cell_measurement_theta_min            14.7
_cell_measurement_theta_max            15.0
_cell_measurement_temperature          296.2
#------------------------------------------------------------------------------
_exptl_crystal_description            'prismatic'
_exptl_crystal_colour                 'colorless'
_exptl_crystal_size_max                0.200
_exptl_crystal_size_mid                0.200
_exptl_crystal_size_min                0.200
_exptl_crystal_size_rad                ?
_exptl_crystal_density_diffrn          1.348
_exptl_crystal_density_meas            ?
_exptl_crystal_density_method         'not measured'
_exptl_absorpt_coefficient_mu          0.467
_exptl_absorpt_correction_type         psi-scan
_exptl_absorpt_process_details        '(North, Phillips & Mathews, 1968)'
_exptl_absorpt_correction_T_min        0.966
_exptl_absorpt_correction_T_max        0.999
#------------------------------------------------------------------------------
# EXPERIMENTAL DATA 
_diffrn_radiation_type                'Mo K�a'
_diffrn_radiation_wavelength           0.7107
_diffrn_measurement_device_type       'Rigaku AFC7R'
_diffrn_measurement_method             �w-2�q
_diffrn_reflns_number                  1824
_diffrn_reflns_av_R_equivalents        0.035
_diffrn_reflns_theta_max               27.49
_diffrn_measured_fraction_theta_max    0.9994
_diffrn_reflns_theta_full              27.49
_diffrn_measured_fraction_theta_full   0.9994
_diffrn_reflns_limit_h_min             0
_diffrn_reflns_limit_h_max             11
_diffrn_reflns_limit_k_min             0
_diffrn_reflns_limit_k_max             6
_diffrn_reflns_limit_l_min             -19
_diffrn_reflns_limit_l_max             19
_diffrn_standards_number              3
_diffrn_standards_interval_count      150
_diffrn_standards_decay_%             0.17
#------------------------------------------------------------------------------
# REFINEMENT DATA 
_refine_special_details
;
Refinement using reflections with F^2^ > 3.0 sigma(F^2^). The weighted R-factor
(wR), goodness of fit (S) and R-factor (gt) are based on F, with F set to zero 
for negative F. The threshold expression of F^2^ > 3.0 sigma(F^2^) is used only 
for calculating R-factor (gt).
;
_reflns_number_total                   1717
_reflns_number_gt                      1473
_reflns_threshold_expression           F^2^>3.0�s(F^2^)
_refine_ls_structure_factor_coef       F
_refine_ls_R_factor_gt                 0.0333
_refine_ls_wR_factor_ref               0.0488
_refine_ls_hydrogen_treatment          refall
_refine_ls_number_reflns               1473
_refine_ls_number_parameters           215
_refine_ls_goodness_of_fit_ref         1.409
_refine_ls_weighting_scheme            calc
_refine_ls_weighting_details

   'w = 1/[�s^2^(Fo) + 0.00063|Fo|^2^]'
_refine_ls_shift/su_max                0.0003
_refine_diff_density_max               0.26
_refine_diff_density_min               -0.27
_refine_ls_extinction_method           
   'Zachariasen(1967) type 2 Gaussian isotropic'
_refine_ls_extinction_coef             0.009(9)
_refine_ls_abs_structure_details       ?
_refine_ls_abs_structure_Flack         -1.2(2)
loop_
_atom_type_symbol
_atom_type_description
_atom_type_scat_dispersion_real
_atom_type_scat_dispersion_imag
_atom_type_scat_source
  'C' 'C'  0.003 0.002 
;International Tables for Crystallography
(1992, Vol. C, Tables 4.2.6.8 and 6.1.1.1)
;
  'H' 'H'  0.000 0.000 
;International Tables for Crystallography
(1992, Vol. C, Table 6.1.1.2)
;
  'N' 'N'  0.006 0.003 
;International Tables for Crystallography
(1992, Vol. C, Tables 4.2.6.8 and 6.1.1.1)
;
  'O' 'O'  0.011 0.006 
;International Tables for Crystallography
(1992, Vol. C, Tables 4.2.6.8 and 6.1.1.1)
;
  'Cl' 'Cl'  0.148 0.159 
;International Tables for Crystallography
(1992, Vol. C, Tables 4.2.6.8 and 6.1.1.1)
;
#------------------------------------------------------------------------------
# ATOMIC COORDINATES AND DISPLACEMENT PARAMETERS 
loop_
_atom_site_label
_atom_site_type_symbol
_atom_site_fract_x
_atom_site_fract_y
_atom_site_fract_z
_atom_site_U_iso_or_equiv
_atom_site_adp_type
_atom_site_occupancy
_atom_site_calc_flag
_atom_site_refinement_flags
_atom_site_disorder_assembly
_atom_site_disorder_group
 Cl(1)  Cl 0.02421(7)  0.0000      0.10426(5)  0.0571(2)   Uani 1.00 d . . .
 Cl(2)  Cl 0.23991(9)  0.0550(3)   0.27525(4)  0.0704(2)   Uani 1.00 d . . .
 O(1)   O  0.5369(2)   -0.1454(5)  0.1793(2)   0.0542(5)   Uani 1.00 d . . .
 N(1)   N  0.5930(2)   0.2765(6)   0.2024(1)   0.0377(5)   Uani 1.00 d . . .
 C(1)   C  0.7446(3)   0.2028(7)   0.3568(2)   0.0405(5)   Uani 1.00 d . . .
 C(2)   C  0.6519(3)   0.3538(9)   0.3997(2)   0.0568(8)   Uani 1.00 d . . .
 C(3)   C  0.6544(4)   0.325(1)    0.4908(2)   0.0685(9)   Uani 1.00 d . . .
 C(4)   C  0.7470(4)   0.1387(10)  0.5401(2)   0.0687(10)  Uani 1.00 d . . .
 C(5)   C  0.8399(5)   -0.0125(9)  0.4990(2)   0.0725(9)   Uani 1.00 d . . .
 C(6)   C  0.8391(4)   0.0181(8)   0.4072(2)   0.0562(7)   Uani 1.00 d . . .
 C(7)   C  0.7497(3)   0.2357(7)   0.2588(2)   0.0396(5)   Uani 1.00 d . . .
 C(8)   C  0.8547(3)   0.4613(7)   0.2436(2)   0.0487(7)   Uani 1.00 d . . .
 C(9)   C  0.4995(3)   0.0821(6)   0.1691(2)   0.0364(5)   Uani 1.00 d . . .
 C(10)  C  0.3392(3)   0.1510(7)   0.1136(1)   0.0365(5)   Uani 1.00 d . . .
 C(11)  C  0.2531(3)   0.3911(7)   0.1344(2)   0.0476(7)   Uani 1.00 d . . .
 C(12)  C  0.2037(3)   0.1342(7)   0.1608(2)   0.0398(5)   Uani 1.00 d . . .
 C(13)  C  0.3184(4)   0.060(1)    0.0171(2)   0.0550(8)   Uani 1.00 d . . .
 H(1)   H  0.585(3)    0.494(8)    0.368(2)    0.057(8)    Uiso 1.00 calc . . .
 H(2)   H  0.583(4)    0.419(8)    0.520(2)    0.066(9)    Uiso 1.00 calc . . .
 H(3)   H  0.748(4)    0.12(1)     0.606(3)    0.10(1)     Uiso 1.00 calc . . .
 H(4)   H  0.907(5)    -0.12(1)    0.527(3)    0.09(1)     Uiso 1.00 calc . . .
 H(5)   H  0.902(4)    -0.08(1)    0.375(2)    0.08(1)     Uiso 1.00 calc . . .
 H(6)   H  0.784(4)    0.067(9)    0.235(2)    0.060(8)    Uiso 1.00 calc . . .
 H(7)   H  0.863(4)    0.483(8)    0.177(2)    0.068(9)    Uiso 1.00 calc . . .
 H(8)   H  0.807(4)    0.615(8)    0.258(2)    0.062(9)    Uiso 1.00 calc . . .
 H(9)   H  0.957(4)    0.444(8)    0.285(2)    0.064(9)    Uiso 1.00 calc . . .
 H(10)  H  0.567(3)    0.409(7)    0.192(2)    0.028(7)    Uiso 1.00 calc . . .
 H(11)  H  0.295(3)    0.505(7)    0.177(2)    0.054(8)    Uiso 1.00 calc . . .
 H(12)  H  0.191(4)    0.474(8)    0.083(2)    0.067(9)    Uiso 1.00 calc . . .
 H(13)  H  0.387(5)    0.12(1)     -0.009(3)   0.09(1)     Uiso 1.00 calc . . .
 H(14)  H  0.222(4)    0.129(10)   -0.017(3)   0.09(1)     Uiso 1.00 calc . . .
 H(15)  H  0.339(4)    -0.123(10)  0.016(3)    0.07(1)     Uiso 1.00 calc . . .

loop_
_atom_site_aniso_label
_atom_site_aniso_U_11
_atom_site_aniso_U_22
_atom_site_aniso_U_33
_atom_site_aniso_U_12
_atom_site_aniso_U_13
_atom_site_aniso_U_23
 Cl(1)  0.0401(3)   0.0571(4)   0.0710(4)   -0.0056(3)  0.0041(3)   -0.0093(4) 
 Cl(2)  0.0763(5)   0.0951(7)   0.0405(3)   0.0158(5)   0.0134(3)   0.0060(4)  
 O(1)   0.047(1)    0.0270(8)   0.079(1)    0.0028(8)   -0.0082(9)  -0.0041(9) 
 N(1)   0.0377(9)   0.0253(10)  0.045(1)    0.0038(8)   -0.0050(8)  0.0013(8)  
 C(1)   0.037(1)    0.032(1)    0.047(1)    -0.0042(9)  -0.0061(8)  -0.0029(9) 
 C(2)   0.051(1)    0.062(2)    0.057(1)    0.017(1)    0.009(1)    0.000(1)   
 C(3)   0.063(2)    0.085(2)    0.060(1)    0.012(2)    0.018(1)    -0.005(2)  
 C(4)   0.084(2)    0.071(2)    0.046(1)    -0.013(1)   0.001(1)    0.000(1)   
 C(5)   0.098(2)    0.056(2)    0.050(1)    0.015(2)    -0.018(1)   0.004(2)   
 C(6)   0.063(1)    0.045(2)    0.051(1)    0.016(1)    -0.010(1)   -0.003(1)  
 C(7)   0.0355(10)  0.031(1)    0.048(1)    0.0046(9)   -0.0032(8)  -0.005(1)  
 C(8)   0.037(1)    0.040(1)    0.065(2)    -0.004(1)   0.002(1)    0.001(1)   
 C(9)   0.037(1)    0.0290(9)   0.040(1)    0.0022(8)   0.0001(8)   -0.0051(9) 
 C(10)  0.0371(9)   0.031(1)    0.038(1)    -0.0019(9)  -0.0022(8)  -0.0003(9) 
 C(11)  0.045(1)    0.031(1)    0.058(2)    0.0041(10)  -0.009(1)   -0.002(1)  
 C(12)  0.0403(10)  0.037(1)    0.0388(9)   0.0036(9)   0.0009(8)   -0.0028(9) 
 C(13)  0.053(1)    0.073(2)    0.037(1)    0.000(2)    0.004(1)    -0.004(1)  
#------------------------------------------------------------------------------
_computing_data_collection            'MSC/AFC Diffractometer Control'
_computing_cell_refinement            'MSC/AFC Diffractometer Control'
_computing_data_reduction             'teXsan Ver. 1.11'
_computing_structure_solution          MULTAN88
_computing_structure_refinement       'teXsan Ver. 1.10'
_computing_publication_material       'teXsan Ver. 1.11'
_computing_molecular_graphics          ?
#------------------------------------------------------------------------------
_geom_special_details
;
 ?
;
loop_
_geom_bond_atom_site_label_1
_geom_bond_atom_site_label_2
_geom_bond_distance
_geom_bond_site_symmetry_1
_geom_bond_site_symmetry_2
_geom_bond_publ_flag
 Cl(1)     C(12)     1.766(3)   . . yes
 Cl(2)     C(12)     1.750(3)   . . yes
 O(1)      C(9)      1.225(4)   . . yes
 N(1)      C(7)      1.472(3)   . . yes
 N(1)      C(9)      1.329(4)   . . yes
 C(1)      C(2)      1.378(4)   . . yes
 C(1)      C(6)      1.388(4)   . . yes
 C(1)      C(7)      1.506(4)   . . yes
 C(2)      C(3)      1.386(5)   . . yes
 C(3)      C(4)      1.378(7)   . . yes
 C(4)      C(5)      1.365(6)   . . yes
 C(5)      C(6)      1.400(5)   . . yes
 C(7)      C(8)      1.530(4)   . . yes
 C(9)      C(10)     1.519(4)   . . yes
 C(10)     C(11)     1.518(4)   . . yes
 C(10)     C(12)     1.500(4)   . . yes
 C(10)     C(13)     1.514(4)   . . yes
 C(11)     C(12)     1.480(5)   . . yes
#------------------------------------------------------------------------------
loop_
_geom_angle_atom_site_label_1
_geom_angle_atom_site_label_2
_geom_angle_atom_site_label_3
_geom_angle
_geom_angle_site_symmetry_1
_geom_angle_site_symmetry_2
_geom_angle_site_symmetry_3
_geom_angle_publ_flag
   C(7)      N(1)      C(9)      122.4(3)   . . . yes
   C(2)      C(1)      C(6)      118.1(3)   . . . yes
   C(2)      C(1)      C(7)      122.6(3)   . . . yes
   C(6)      C(1)      C(7)      119.3(3)   . . . yes
   C(1)      C(2)      C(3)      121.1(4)   . . . yes
   C(2)      C(3)      C(4)      120.4(4)   . . . yes
   C(3)      C(4)      C(5)      119.4(4)   . . . yes
   C(4)      C(5)      C(6)      120.4(4)   . . . yes
   C(1)      C(6)      C(5)      120.6(4)   . . . yes
   N(1)      C(7)      C(1)      112.3(2)   . . . yes
   N(1)      C(7)      C(8)      108.3(2)   . . . yes
   C(1)      C(7)      C(8)      111.9(2)   . . . yes
   O(1)      C(9)      N(1)      123.8(3)   . . . yes
   O(1)      C(9)      C(10)     119.1(3)   . . . yes
   N(1)      C(9)      C(10)     117.1(3)   . . . yes
   C(9)      C(10)     C(11)     120.9(2)   . . . yes
   C(9)      C(10)     C(12)     116.4(2)   . . . yes
   C(9)      C(10)     C(13)     112.3(3)   . . . yes
   C(11)     C(10)     C(12)     58.7(2)    . . . yes
   C(11)     C(10)     C(13)     119.2(3)   . . . yes
   C(12)     C(10)     C(13)     119.4(2)   . . . yes
   C(10)     C(11)     C(12)     60.0(2)    . . . yes
   Cl(1)     C(12)     Cl(2)     110.7(2)   . . . yes
   Cl(1)     C(12)     C(10)     119.7(2)   . . . yes
   Cl(1)     C(12)     C(11)     120.1(2)   . . . yes
   Cl(2)     C(12)     C(10)     119.0(2)   . . . yes
   Cl(2)     C(12)     C(11)     118.4(2)   . . . yes
   C(10)     C(12)     C(11)     61.3(2)    . . . yes
#------------------------------------------------------------------------------
loop_
_geom_torsion_atom_site_label_1
_geom_torsion_atom_site_label_2
_geom_torsion_atom_site_label_3
_geom_torsion_atom_site_label_4
_geom_torsion
_geom_torsion_site_symmetry_1
_geom_torsion_site_symmetry_2
_geom_torsion_site_symmetry_3
_geom_torsion_site_symmetry_4
_geom_torsion_publ_flag
 Cl(1)     C(12)     C(10)     C(9)      -138.1(3)  . . . . yes
 Cl(1)     C(12)     C(10)     C(11)     110.2(3)   . . . . yes
 Cl(1)     C(12)     C(10)     C(13)     1.9(4)     . . . . yes
 Cl(1)     C(12)     C(11)     C(10)     -109.6(2)  . . . . yes
 Cl(2)     C(12)     C(10)     C(9)      3.3(4)     . . . . yes
 Cl(2)     C(12)     C(10)     C(11)     -108.4(3)  . . . . yes
 Cl(2)     C(12)     C(10)     C(13)     143.3(3)   . . . . yes
 Cl(2)     C(12)     C(11)     C(10)     109.4(2)   . . . . yes
 O(1)      C(9)      N(1)      C(7)      -2.8(5)    . . . . yes
 O(1)      C(9)      C(10)     C(11)     149.1(3)   . . . . yes
 O(1)      C(9)      C(10)     C(12)     81.3(4)    . . . . yes
 O(1)      C(9)      C(10)     C(13)     -61.5(4)   . . . . yes
 N(1)      C(7)      C(1)      C(2)      -42.5(4)   . . . . yes
 N(1)      C(7)      C(1)      C(6)      139.2(3)   . . . . yes
 N(1)      C(9)      C(10)     C(11)     -32.3(4)   . . . . yes
 N(1)      C(9)      C(10)     C(12)     -100.1(3)  . . . . yes
 N(1)      C(9)      C(10)     C(13)     117.1(3)   . . . . yes
 C(1)      C(2)      C(3)      C(4)      -1.8(7)    . . . . yes
 C(1)      C(6)      C(5)      C(4)      0.3(6)     . . . . yes
 C(1)      C(7)      N(1)      C(9)      -86.1(3)   . . . . yes
 C(2)      C(1)      C(6)      C(5)      -0.1(5)    . . . . yes
 C(2)      C(1)      C(7)      C(8)      79.7(3)    . . . . yes
 C(2)      C(3)      C(4)      C(5)      1.9(7)     . . . . yes
 C(3)      C(2)      C(1)      C(6)      0.8(6)     . . . . yes
 C(3)      C(2)      C(1)      C(7)      -177.5(4)  . . . . yes
 C(3)      C(4)      C(5)      C(6)      -1.2(7)    . . . . yes
 C(5)      C(6)      C(1)      C(7)      178.3(4)   . . . . yes
 C(6)      C(1)      C(7)      C(8)      -98.7(3)   . . . . yes
 C(7)      N(1)      C(9)      C(10)     178.7(2)   . . . . yes
 C(8)      C(7)      N(1)      C(9)      149.7(3)   . . . . yes
 C(9)      C(10)     C(11)     C(12)     -104.1(3)  . . . . yes
 C(9)      C(10)     C(12)     C(11)     111.7(3)   . . . . yes
 C(11)     C(12)     C(10)     C(13)     -108.2(3)  . . . . yes
 C(12)     C(11)     C(10)     C(13)     108.6(3)   . . . . yes
 C(12)     C(11)     C(10)     C(13)     108.6(3)   . . . . yes
#------------------------------------------------------------------------------
loop_
_geom_contact_atom_site_label_1
_geom_contact_atom_site_label_2
_geom_contact_distance
_geom_contact_site_symmetry_1
_geom_contact_site_symmetry_2
_geom_contact_publ_flag
 Cl(2)     C(4)      3.519(5)   . 2_646 ?
 O(1)      N(1)      3.046(3)   . 1_545 ?
 O(1)      C(11)     3.415(4)   . 1_545 ?
 O(1)      C(8)      3.417(4)   . 1_545 ?
#------------------------------------------------------------------------------
#------------------------------------------------------------------------------
